# Supplementary material
Source: PubMed Central journal article supplement (PMC3045004)

## Supplementary Figure Legend

**Supplementary figure 1: Optimal amplification of PrPSc from human vCJD.** Samples of brain homogenate from a patients affected by vCJD were diluted serially into 10% brain homogenate from transgenic mice expressing human PrPC (MM at position 129). Samples were either frozen or subjected to 96 PMCA cycles in conversion buffer alone (middle panel) or supplemented with 0.05% digitonin and 4mM EDTA (lower panel). After amplification, samples were treated with PK and analyzed by Western blot using the 3F4 antibody. All samples were treated with PK, except the normal brain homogenate (NBH) used as a control for electrophoretic migration.

Supplementary figure 1

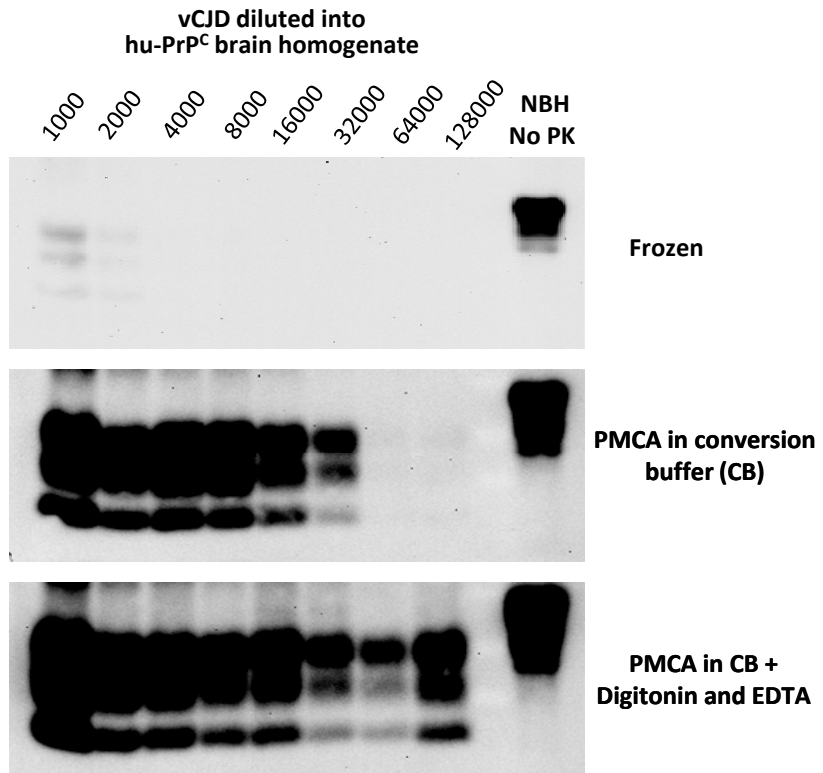

Supplement: supp_M110.198465_jbc.M110.198465-1.pdf [file supp_M110.198465_jbc.M110.198465-1.pdf]
